# Supplementary material for: Simultaneous Content Determination of Mono-, Di-, and Fructo-oligosaccharides in Citrus Fruit Juices Using an FTIR-PLS Method Based on Selected Absorption Bands
Source: Hindawi journal article supplement (doi:10.1155/2024/9265590), 2024-01-10
Supplement: f1 [file 9265590.f1.pdf]

# Supplementary Materials

**Table S1. Wavenumbers used in the model calibration of enzymatically treated orange juice**

## (a) Absorbance

|                | Wavenumber ( cm <sup>-1</sup> )                                                                                                                                                                                                                                                                                                                                                                                                                                                                                                                                                                                                                                                                                                                                                                                                                                                                                                                                                                                                              |                                                         |                                                           |                                                           |                                                          |
|----------------|----------------------------------------------------------------------------------------------------------------------------------------------------------------------------------------------------------------------------------------------------------------------------------------------------------------------------------------------------------------------------------------------------------------------------------------------------------------------------------------------------------------------------------------------------------------------------------------------------------------------------------------------------------------------------------------------------------------------------------------------------------------------------------------------------------------------------------------------------------------------------------------------------------------------------------------------------------------------------------------------------------------------------------------------|---------------------------------------------------------|-----------------------------------------------------------|-----------------------------------------------------------|----------------------------------------------------------|
|                | Glc                                                                                                                                                                                                                                                                                                                                                                                                                                                                                                                                                                                                                                                                                                                                                                                                                                                                                                                                                                                                                                          | Fru                                                     | Suc                                                       | GF2                                                       | GF3                                                      |
| <b>Model A</b> | 900, 902, 904, 906, 908, 910, 912, 914, 916, 918, 920, 922, 924, 926, 928, 930, 932, 934, 936, 938, 940, 942, 944, 946, 948, 950, 952, 954, 956, 958, 960, 962, 964, 966, 968, 970, 972, 974, 976, 978, 980, 982, 984, 986, 988, 990, 992, 994, 996, 998, 1000, 1002, 1004, 1006, 1008, 1010, 1012, 1014, 1016, 1018, 1020, 1022, 1024, 1026, 1028, 1030, 1032, 1034, 1036, 1038, 1040, 1042, 1044, 1046, 1048, 1050, 1052, 1054, 1056, 1058, 1060, 1062, 1064, 1066, 1068, 1070, 1072, 1074, 1076, 1078, 1080, 1082, 1084, 1086, 1088, 1090, 1092, 1094, 1096, 1098, 1100, 1102, 1104, 1106, 1108, 1110, 1112, 1114, 1116, 1118, 1120, 1122, 1124, 1126, 1128, 1130, 1132, 1134, 1136, 1138, 1140, 1142, 1144, 1146, 1148, 1150, 1152, 1154, 1156, 1158, 1160, 1162, 1164, 1166, 1168, 1170, 1172, 1174, 1176, 1178, 1180, 1182, 1184, 1186, 1188, 1190, 1192, 1194, 1196, 1198, 1200, 1202, 1204, 1206, 1208, 1210, 1212, 1214, 1216, 1218, 1220, 1222, 1224, 1226, 1228, 1230, 1232, 1234, 1236, 1238, 1240, 1242, 1244, 1246, 1248, 1250 |                                                         |                                                           |                                                           |                                                          |
| <b>Model B</b> | 918, 994, 1018, 1034, 1056, 1080, 1106, 1152                                                                                                                                                                                                                                                                                                                                                                                                                                                                                                                                                                                                                                                                                                                                                                                                                                                                                                                                                                                                 | 920, 968, 980, 1018, 1034, 1064, 1084, 1102, 1156, 1182 | 928, 1000, 1018, 1032, 1056, 1082, 1114, 1138, 1162, 1212 | 930, 1002, 1020, 1034, 1056, 1078, 1116, 1136, 1162, 1216 | 930, 998, 1018, 1034, 1054, 1080, 1116, 1136, 1162, 1220 |
| <b>Model C</b> | 918, 920, 928, 930, 968, 980, 994, 998, 1000, 1002, 1018, 1020, 1032, 1034, 1054, 1056, 1064, 1078, 1080, 1082, 1084, 1102, 1106, 1114, 1116, 1136, 1138, 1152, 1156, 1162, 1182, 1212, 1216, 1220                                                                                                                                                                                                                                                                                                                                                                                                                                                                                                                                                                                                                                                                                                                                                                                                                                           |                                                         |                                                           |                                                           |                                                          |

## (b) 2nd derivative

|                | Wavenumber ( cm <sup>-1</sup> )                                                                                                                                                                                                                                                                                                                                                                                                                                                                                                                                                                                                                                                                                                                                                                                                                                                                                                                                                                                                              |                                        |                                  |                                                    |                                                    |
|----------------|----------------------------------------------------------------------------------------------------------------------------------------------------------------------------------------------------------------------------------------------------------------------------------------------------------------------------------------------------------------------------------------------------------------------------------------------------------------------------------------------------------------------------------------------------------------------------------------------------------------------------------------------------------------------------------------------------------------------------------------------------------------------------------------------------------------------------------------------------------------------------------------------------------------------------------------------------------------------------------------------------------------------------------------------|----------------------------------------|----------------------------------|----------------------------------------------------|----------------------------------------------------|
|                | Glc                                                                                                                                                                                                                                                                                                                                                                                                                                                                                                                                                                                                                                                                                                                                                                                                                                                                                                                                                                                                                                          | Fru                                    | Suc                              | GF2                                                | GF3                                                |
| <b>Model A</b> | 900, 902, 904, 906, 908, 910, 912, 914, 916, 918, 920, 922, 924, 926, 928, 930, 932, 934, 936, 938, 940, 942, 944, 946, 948, 950, 952, 954, 956, 958, 960, 962, 964, 966, 968, 970, 972, 974, 976, 978, 980, 982, 984, 986, 988, 990, 992, 994, 996, 998, 1000, 1002, 1004, 1006, 1008, 1010, 1012, 1014, 1016, 1018, 1020, 1022, 1024, 1026, 1028, 1030, 1032, 1034, 1036, 1038, 1040, 1042, 1044, 1046, 1048, 1050, 1052, 1054, 1056, 1058, 1060, 1062, 1064, 1066, 1068, 1070, 1072, 1074, 1076, 1078, 1080, 1082, 1084, 1086, 1088, 1090, 1092, 1094, 1096, 1098, 1100, 1102, 1104, 1106, 1108, 1110, 1112, 1114, 1116, 1118, 1120, 1122, 1124, 1126, 1128, 1130, 1132, 1134, 1136, 1138, 1140, 1142, 1144, 1146, 1148, 1150, 1152, 1154, 1156, 1158, 1160, 1162, 1164, 1166, 1168, 1170, 1172, 1174, 1176, 1178, 1180, 1182, 1184, 1186, 1188, 1190, 1192, 1194, 1196, 1198, 1200, 1202, 1204, 1206, 1208, 1210, 1212, 1214, 1216, 1218, 1220, 1222, 1224, 1226, 1228, 1230, 1232, 1234, 1236, 1238, 1240, 1242, 1244, 1246, 1248, 1250 |                                        |                                  |                                                    |                                                    |
| <b>Model B</b> | 920, 990, 1034, 1080, 1110, 1156                                                                                                                                                                                                                                                                                                                                                                                                                                                                                                                                                                                                                                                                                                                                                                                                                                                                                                                                                                                                             | 922, 974, 1062, 1088, 1108, 1156, 1188 | 928, 996, 1056, 1110, 1140, 1212 | 928, 994, 1028, 1060, 1074, 1114, 1136, 1168, 1216 | 930, 994, 1030, 1060, 1072, 1114, 1138, 1168, 1218 |
| <b>Model C</b> | 920, 922, 928, 930, 974, 990, 994, 996, 1028, 1030, 1034, 1056, 1060, 1062, 1072, 1074, 1080, 1088, 1108, 1110, 1114, 1136, 1138, 1140, 1156, 1168, 1188, 1212, 1216, 1218                                                                                                                                                                                                                                                                                                                                                                                                                                                                                                                                                                                                                                                                                                                                                                                                                                                                   |                                        |                                  |                                                    |                                                    |

**Table S2. Wavenumbers used in the model calibration of fruit juice with added fructo-oligosaccharides.**

|                | Wavenumber ( cm <sup>-1</sup> )                                                                                                                                                                                                                                                                                                                                                                                                                                                                                                                                                                                                                                                                                                                                                                                                                                                                                                                                                                                                              |                                                                  |                                                                    |                                                                    |                                                                   |                                                          |
|----------------|----------------------------------------------------------------------------------------------------------------------------------------------------------------------------------------------------------------------------------------------------------------------------------------------------------------------------------------------------------------------------------------------------------------------------------------------------------------------------------------------------------------------------------------------------------------------------------------------------------------------------------------------------------------------------------------------------------------------------------------------------------------------------------------------------------------------------------------------------------------------------------------------------------------------------------------------------------------------------------------------------------------------------------------------|------------------------------------------------------------------|--------------------------------------------------------------------|--------------------------------------------------------------------|-------------------------------------------------------------------|----------------------------------------------------------|
|                | Glc                                                                                                                                                                                                                                                                                                                                                                                                                                                                                                                                                                                                                                                                                                                                                                                                                                                                                                                                                                                                                                          | Fru                                                              | Suc                                                                | GF2                                                                | GF3                                                               | GF4                                                      |
| <b>Model A</b> | 900, 902, 904, 906, 908, 910, 912, 914, 916, 918, 920, 922, 924, 926, 928, 930, 932, 934, 936, 938, 940, 942, 944, 946, 948, 950, 952, 954, 956, 958, 960, 962, 964, 966, 968, 970, 972, 974, 976, 978, 980, 982, 984, 986, 988, 990, 992, 994, 996, 998, 1000, 1002, 1004, 1006, 1008, 1010, 1012, 1014, 1016, 1018, 1020, 1022, 1024, 1026, 1028, 1030, 1032, 1034, 1036, 1038, 1040, 1042, 1044, 1046, 1048, 1050, 1052, 1054, 1056, 1058, 1060, 1062, 1064, 1066, 1068, 1070, 1072, 1074, 1076, 1078, 1080, 1082, 1084, 1086, 1088, 1090, 1092, 1094, 1096, 1098, 1100, 1102, 1104, 1106, 1108, 1110, 1112, 1114, 1116, 1118, 1120, 1122, 1124, 1126, 1128, 1130, 1132, 1134, 1136, 1138, 1140, 1142, 1144, 1146, 1148, 1150, 1152, 1154, 1156, 1158, 1160, 1162, 1164, 1166, 1168, 1170, 1172, 1174, 1176, 1178, 1180, 1182, 1184, 1186, 1188, 1190, 1192, 1194, 1196, 1198, 1200, 1202, 1204, 1206, 1208, 1210, 1212, 1214, 1216, 1218, 1220, 1222, 1224, 1226, 1228, 1230, 1232, 1234, 1236, 1238, 1240, 1242, 1244, 1246, 1248, 1250 |                                                                  |                                                                    |                                                                    |                                                                   |                                                          |
| <b>Model B</b> | 918, 994, 1018,<br>1034, 1056, 1080,<br>1106, 1152                                                                                                                                                                                                                                                                                                                                                                                                                                                                                                                                                                                                                                                                                                                                                                                                                                                                                                                                                                                           | 920, 968, 980,<br>1018, 1034, 1064,<br>1084, 1102, 1156,<br>1182 | 928, 1000, 1018,<br>1032, 1056, 1082,<br>1114, 1138, 1162,<br>1212 | 930, 1002, 1020,<br>1034, 1056, 1078,<br>1116, 1136, 1162,<br>1216 | 930, 998, 1018,<br>1034, 1054, 1080,<br>1116, 1136, 1162,<br>1220 | 932, 996, 1018,<br>1036, 1054, 1118,<br>1134, 1162, 1218 |
| <b>Model C</b> | 918, 920, 928, 930, 932, 968, 980, 994, 996, 998, 1000, 1002, 1018, 1020, 1032, 1034, 1036, 1054, 1056, 1064, 1078, 1080, 1082, 1084, 1102, 1106, 1114, 1116, 1118, 1134, 1136, 1138, 1152, 1156, 1162, 1182, 1212, 1216, 1218, 1220                                                                                                                                                                                                                                                                                                                                                                                                                                                                                                                                                                                                                                                                                                                                                                                                         |                                                                  |                                                                    |                                                                    |                                                                   |                                                          |

**Table S3. Sugar concentrations of citrus fruit juices with added fructo-oligosaccharides as determined by PLS**

|                  |   | Concentrations ( g/L ) |      |      |      |      |     |
|------------------|---|------------------------|------|------|------|------|-----|
|                  |   | Glc                    | Fru  | Suc  | GF2  | GF3  | GF4 |
| Valencia Orange  | A | 18.8                   | 21.6 | 41.1 | 5.1  | 6.6  | 0.6 |
|                  | B | 19.0                   | 21.6 | 41.8 | 6.3  | 8.5  | 1.2 |
|                  | C | 19.2                   | 21.9 | 42.3 | 8.0  | 10.7 | 1.4 |
|                  | D | 21.2                   | 21.9 | 43.3 | 12.0 | 16.2 | 2.1 |
|                  | E | 26.1                   | 22.9 | 44.4 | 8.1  | 8.4  | 1.0 |
|                  | F | 28.3                   | 23.5 | 45.5 | 9.9  | 9.8  | 1.3 |
|                  | G | 31.4                   | 34.2 | 22.2 | 4.8  | 6.3  | 0.7 |
|                  | H | 31.6                   | 34.3 | 22.8 | 6.4  | 8.4  | 1.2 |
|                  | I | 38.7                   | 35.5 | 25.1 | 8.2  | 8.1  | 1.1 |
|                  | J | 40.2                   | 35.8 | 26.4 | 10.4 | 10.8 | 1.4 |
| Mandarin Orange  | K | 21.2                   | 21.8 | 22.5 | 5.7  | 7.7  | 1.0 |
|                  | L | 28.2                   | 23.5 | 25.9 | 6.7  | 6.8  | 0.9 |
| Citrus Unshiu    | M | 20.7                   | 21.5 | 23.1 | 7.4  | 9.8  | 1.3 |
|                  | N | 28.7                   | 23.2 | 26.3 | 9.2  | 9.4  | 1.4 |
| White Grapefruit | O | 12.2                   | 15.3 | 43.3 | 7.1  | 9.2  | 1.2 |
|                  | P | 20.2                   | 16.6 | 46.9 | 8.3  | 8.1  | 1.1 |
| Ruby Grapefruit  | Q | 19.2                   | 21.8 | 49.2 | 6.6  | 7.9  | 1.1 |
|                  | R | 20.1                   | 22.1 | 50.9 | 7.7  | 9.8  | 1.2 |
